# Supplementary material
Source: PubMed Central journal article supplement (PMC4474321)
Supplement: JVI.00693-15_zjv012150458so1.pdf [file JVI.00693-15_zjv012150458so1.pdf]

Table A1. Primers utilized in the qPCR and RT-PCR assays.

| Primer       | Sequence               | Target Gene                     |
|--------------|------------------------|---------------------------------|
| P1           | ACCAGTTGAGCCAGATAAG    | All HIV mRNA (NL4-3, LAI.2)     |
| P2           | ACTTCTCTCTCAGGGTCATC   | All HIV mRNA (NL4-3, LAI.2)     |
| P1-MJ4       | GTAGCTGAAGGAACAGATAG   | All HIV mRNA (MJ4)              |
| P2-MJ4       | AGCTGCTTCAAAGCCCTGTC   | All HIV mRNA (MJ4)              |
| P1-94UG      | CAAGGCTTCTTCCCTGATTG   | All HIV mRNA (94UG114.1.6)      |
| P2-94UG      | TCCTTTGGCTCCATTGGTAC   | All HIV mRNA (94UG114.1.6)      |
| P3           | TTCTTCAGAGCAGACCAGAGC  | gag/pol (NL4-3, LAI.2)          |
| P4           | GCTGCCAAAGAGTGATCTGA   | gag/pol (NL4-3, LAI.2)          |
| P3-MJ4       | TGACACACAATCCACCTATC   | gag/pol (MJ4)                   |
| P4-MJ4       | GCTGACAGGGCTATACATTC   | gag/pol (MJ4)                   |
| P3-94UG      | TGACAAGCAATCCACCTATC   | gag/pol (94UG114.1.6)           |
| P4-94UG      | GCTGACAGGGCTATACATTC   | gag/pol (94UG114.1.6)           |
| P5           | GGCGGCGACTGGAAGAAGC    | env/vpu (NL4-3, LAI.2)          |
| P6           | TGATTACTATGGACCACACA   | env/vpu (NL4-3, LAI.2)          |
| P7           | AGGGGCGGCGACTGAATTGGGT | tat (NL4-3, LAI.2)              |
| P8           | GATTGGGAGGTGGGTTGCTTTG | tat, rev (NL4-3, LAI.2)         |
| P9           | AGGGGCGGCGACTGCCTTAGGC | rev (NL4-3, LAI.2)              |
| P10          | GGCTAATCAAGATCCTGTAC   | Multiple Spliced (NL4-3, LAI.2) |
| P11          | ATCGAATGGATCTGCCTCTG   | Multiple Spliced (NL4-3, LAI.2) |
| P10-MJ4      | TCAAGCAGTGAGGATCATC    | Multiple Spliced (MJ4)          |
| P11-MJ4      | TCCACCTTCTTCTTCGATTC   | Multiple Spliced (MJ4)          |
| P10-94UG     | GGTCAGGCTAATCAAGATC    | Multiple Spliced (94UG114.1.6)  |
| P11-94UG     | TCCACCTTCTTCTTCTATTC   | Multiple Spliced (94UG114.1.6)  |
| CCDC115-F    | CCCTGAACTGGTTTGGAAATC  | CCDC115 exon 5                  |
| CCDC115-R    | TCTGGAGGCTGGCTATGTCT   | CCDC115 exon 5                  |
| C5orf34-F    | CAGAGCATTGTTGGCAAATCA  | C5orf34 exon 2                  |
| C5orf34-R    | CTGGGCCATCTCACTTCTGT   | C5orf34 exon 2                  |
| ENSAex2F     | AGGAGAAAGAAGGTATTCTG   | ENSA exon 3                     |
| ENSA_ex4R2   | AGTCACCAGGTTCTTGCTCTG  | ENSA exon 3                     |
| FAS-EX5-F    | TCAAGGAATGCACACTCACC   | FAS exon 5                      |
| FAS-EX7-R    | TCCTTTCTGTGCTTTCTGCAT  | FAS exon 5                      |
| hnRNPA1ex6F2 | AGGAAACTTCAGTGGTCGTG   | HNRNPA1 exon 7b                 |

|               |                       |                      |
|---------------|-----------------------|----------------------|
| hnRNPA1ex10R2 | CACAAATCTGTTGTAACCTG  | HNRNPA1 exon 7b      |
| hnDex6F2      | AAAAGTAGCCATGTCGAAG   | HNRNPD exon 7        |
| hnDex8R       | TTGGGGATAAGTTGCAAATG  | HNRNPD exon 7        |
| INO80E-F      | CCCCCATTCCTTCTGACTA   | INO80E exon 7-8-9-10 |
| INO80E-R      | ACCAGGTCATCGTCTCCATC  | INO80E exon 7-8-9-10 |
| LPIN1-F       | CCTCAGTCAGCCTCATAACC  | LPIN1 exon 7         |
| LPIN1-R       | TTCTTCTGCCCTGTCCTTTC  | LPIN1 exon 7         |
| MTMR14-F      | AGAGCCACTCATCCTCTCCA  | MTMR14 exon 18       |
| MTMR14-R      | AGCCGAGTCTCTCGATCACT  | MTMR14 exon 18       |
| NETO2-Ex7F    | GTCTATGATGGAAGCAGTTC  | NETO2 exon 8         |
| NETO2-Ex9R    | CAAGTCTGCCAGGTCTGCAG  | NETO2 exon 8         |
| PEA15-F       | TGCTCACCCCTTCCTAATTG  | PEA15 exon 3         |
| PEA15-R       | TTGTTGGTCAGGTCTTGCAG  | PEA15 exon 3         |
| RPAIN-F       | TAGACATGGCTGTGCTGGAG  | RPAIN exon 4-5       |
| RPAIN-R       | TCAGGTGTGTGGGGACAAT   | RPAIN exon 4-5       |
| SRSF1-F372    | TCTCTGGACTGCCTCCAAGT  | SRSF1 exon 3         |
| SRSF1-R572    | CGGATGTAGGGCAGTTTCTCC | SRSF1 exon 3         |
| SSFA2-F       | TCCGAATGGAACCTCAGGAC  | SSFA2 exon 15        |
| SSFA2-R       | CTGCTCCTGCATCAGTTCAG  | SSFA2 exon 15        |
| TOP3B-F       | AGAGGCTGCGACTACATCGT  | TOP3B exon 6         |
| TOP3B-R       | GATGTCTGTGTCCGTGATGG  | TOP3B exon 6         |
